# Supplementary material for: Does Chronic Sleep Fragmentation Lead to Alzheimer's Disease in Young Wild-Type Mice?
Source: Front Aging Neurosci. 2021 Dec 21;13:759983. doi: 10.3389/fnagi.2021.759983 (PMC8724697; doi:10.3389/fnagi.2021.759983)
Supplement: Supplementary file 2 [file Table_1.XLSX]

## Sheet: Sheet1
gene id	normal sleep1 vs sleep fragmentation1		normal sleep1 vs sleep fragmentation2		normal sleep1 vs sleep fragmentation3		normal sleep2 vs sleep fragmentation1		normal sleep2 vs sleep fragmentation2		normal sleep2 vs sleep fragmentation3		normal sleep3 vs sleep fragmentation1		normal sleep3 vs sleep fragmentation2		normal sleep3 vs sleep fragmentation3
	log2(FC)	p-adjust	log2(FC)	p-adjust	log2(FC)	p-adjust	log2(FC)	p-adjust	log2(FC)	p-adjust	log2(FC)	p-adjust	log2(FC)	p-adjust	log2(FC)	p-adjust	log2(FC)	p-adjust
ENSMUSG00000109523	11.21	1.16e-09	11.1	5.15e-10	11.22	1.885e-10	11.13	2.106e-09	11.01	7.617e-10	11.13	2.048e-10	11.42	3.016e-10	11.3	1.099e-10	11.42	2.955e-11
ENSMUSG00000097142	11.02	2.054e-09							-12.14	4.903e-13	-13.12	9.999e-16			-12.22	2.857e-13	-13.2	5.727e-16
ENSMUSG00000113525	10.7	1.119e-08					8.547	0.001708	-7.747	0.01371							-3.008	0.01693
ENSMUSG00000043346	9.879	1.498e-06					10.78	9.934e-09									-10.46	8.902e-09
ENSMUSG00000037827	9.566	8.075e-06	9.449	5.054e-06							-8.536	0.0003597					-8.615	0.0001802
ENSMUSG00000044645	-8.816	0.0005525													9.33	1.034e-05	9.448	2.564e-06
ENSMUSG00000107023	-8.594	0.001182	-9.765	1.091e-06	-8.912	6.401e-05
ENSMUSG00000112743	-8.594	0.001182			-9.175	1.656e-05	-8.51	0.001708			-9.09	2.097e-05	-8.588	0.001111			-9.17	9.6e-06
ENSMUSG00000041534	-5.174	0.001182					-9.171	6.115e-05							3.744	0.0005552	7.052	1.012e-09
ENSMUSG00000108815	-8.469	0.001955							8.425	0.0008219	8.551	0.0003597	-8.462	0.001796
ENSMUSG00000095127	8.321	0.003645			-3.271	-3.271					-6.782	3.433e-09					-8.418	9.295e-11
ENSMUSG00000096336	3.978	0.004487	5.485	4.621e-05	3.103	0.02498
ENSMUSG00000097590	8.044	0.00965							-8.174	0.002676	-7.782	0.007532	8.465	0.001796
ENSMUSG00000081752	8	0.01075							-10.14	1.095e-07					-10.22	7.755e-08
ENSMUSG00000111291	7.907	0.01547					9.315	3.928e-05					9.091	9.838e-05
ENSMUSG00000023439	-4.542	0.01547					-5.295	0.008039							4.734	6.812e-05	6.504	1.462e-07
ENSMUSG00000073060	5.11	0.01742	8.168	0.002462							-8.01	0.003673					-8.09	0.001825
ENSMUSG00000053706	3.109	0.02735	10.53	1.308e-08	10.65	4.229e-09			8.136	0.003031	8.262	0.00127
ENSMUSG00000040046	-3.295	0.02946					-4.109	0.0032							3.902	0.0003049	6.12	2.311e-08
ENSMUSG00000066315			-13.77	2.276e-17	-13.76	1.89e-17			-13.68	4.182e-17	-13.67	3.452e-17			-13.76	2.415e-17	-13.75	1.963e-17
ENSMUSG00000105361					-15.2	1.785e-21			-15.12	3.267e-21	-15.12	3.267e-21			-13.73	2.415e-17	-15.2	1.853e-21
ENSMUSG00000095595			13.55	5.389e-17	4.736	8.593e-07			13.37	1.864e-16	4.641	1.24e-06			13.48	8.857e-17	4.666	8.346e-07
ENSMUSG00000094103			-12.92	3.054e-15	-12.92	3.873e-15			-12.83	5.629e-15	-12.84	5.218e-15			-12.91	3.251e-15	-12.92	3.005e-15
ENSMUSG00000087563			10.96	1.066e-09	11.08	3.473e-10			10.74	3.663e-09	10.87	1.06e-09			9.694	1.42e-06	9.812	3.319e-07
ENSMUSG00000097221			10.91	1.245e-09	11.03	3.846e-10			10.02	2.091e-07	10.14	7.61e-08			10.62	7.282e-09	10.74	1.939e-09
ENSMUSG00000046229			6.112	1.4e-08	9.026	3.457e-12			6.297	3.842e-09	9.198	1.414e-12			6.611	6.978e-10	9.517	9.944e-14
ENSMUSG00000098650			-10.48	1.423e-08					-10.39	2.851e-08					-10.47	1.667e-08
ENSMUSG00000042938			-9.78	1.091e-06	-10.09	1.054e-07			-9.685	1.42e-06	-10.01	1.535e-07			-9.77	1.008e-06	-10.09	7.115e-08
ENSMUSG00000070858			5.217	1.217e-06	6.3	1.226e-08			5.38	4.023e-07	6.459	7.015e-09			5.553	1.632e-07	6.629	1.339e-09
ENSMUSG00000022748			4.525	2.341e-06	4.412	3.046e-06			5.08	8.907e-08	4.963	1.12e-07			4.096	2.467e-05	3.975	2.155e-05
ENSMUSG00000097461			-9.579	2.681e-06	-9.648	1.3e-06			-9.485	4.716e-06	-9.563	1.627e-06			-9.57	2.942e-06	-9.643	8.346e-07
ENSMUSG00000097078			9.449	5.054e-06	5.48	6.401e-05			9.373	7.565e-06	5.489	8.549e-05			9.097	3.261e-05	5.13	0.0002642
ENSMUSG00000074228			4.746	4.053e-05	4.115	0.0001833			3.937	0.001977	3.302	0.008227			4.422	0.0001963	3.784	0.0006604
ENSMUSG00000064220			4.064	0.0001221	11.85	3.457e-12			4.139	9.014e-05	11.84	2.363e-12			4.643	4.737e-06	12.42	7.394e-14
ENSMUSG00000083405			8.811	0.0001501							-8.244	0.00127					-8.324	0.0006595
ENSMUSG00000026822			-3.968	0.0001567	-3.947	0.0001171							-3.034	0.0356	-4.434	1.704e-05	-4.42	7.452e-06
ENSMUSG00000097185			5.838	0.0001968	9.248	1.095e-05			5.846	0.0002921	9.178	1.486e-05			5.928	0.0001203	9.327	4.95e-06
ENSMUSG00000096056			8.636	0.0003095					9.339	8.792e-06			-8.213	0.005527			-9.285	5.66e-06
ENSMUSG00000090996			8.609	0.0003486	5.557	0.001122			9.39	7.257e-06	6.419	1.81e-05			8.617	0.0003049	5.567	0.000648
ENSMUSG00000054716			3.648	0.0004104	5.063	1.823e-07			3.552	0.0006592	4.963	3.331e-07			3.752	0.0002123	5.16	7.115e-08
ENSMUSG00000068696			3.709	0.001159					3.872	0.0005681					4.229	7.43e-05
ENSMUSG00000101013			4.043	0.00142	10.13	8.652e-08			4.21	0.0005472	10.21	5.558e-08			4.538	0.0001109	10.61	3.87e-09
ENSMUSG00000052605			-4.698	0.001553	-4.553	0.00144			-9.13	2.449e-05	-9.11	1.917e-05			-5.235	0.0004562	-5.099	0.0002844
ENSMUSG00000106106			3.263	0.002014					3.172	0.003031					2.784	0.01852
ENSMUSG00000092329			-3.293	0.002073	-3.239	0.002149			-4.313	1.146e-05	-4.263	1.08e-05
ENSMUSG00000022615			3.537	0.002254	4.446	3.811e-05			3.212	0.01261	4.117	0.0001954			3.044	0.02206	3.946	0.0003469
ENSMUSG00000096938			4.429	0.003646	4.275	0.001795			3.838	0.03082	3.682	0.02807			3.932	0.01439	3.772	0.01039
ENSMUSG00000080058			-4.72	0.006178	-5.049	0.0006199									-3.75	0.01619	-4.082	0.002686
ENSMUSG00000046721			7.97	0.006196	8.091	0.002782			7.669	0.02083	7.795	0.009057	-10.28	1.705e-07
ENSMUSG00000108452			3.345	0.00959	4.582	0.000109			3.182	0.02026	4.413	0.0003597			2.971	0.0474	4.2	0.0005125
ENSMUSG00000113136			2.982	0.009712	2.606	0.04443			3.349	0.001736	2.969	0.00649
ENSMUSG00000097038			-7.785	0.01428			9.64	9.227e-06			9.644	1.235e-06			-7.775	0.01372
ENSMUSG00000029368			2.86	0.0199					2.732	0.03484					2.742	0.03014
ENSMUSG00000050138			3.001	0.02149	3.604	0.001537			2.867	0.04598	3.467	0.002872			3.253	0.006206	3.849	0.0002844
ENSMUSG00000035540			3.13	0.02352	3.382	0.005351					3.135	0.01485			3.004	0.03677	3.248	0.006218
ENSMUSG00000032446			4.722	0.02946					5.284	0.003674							-3.64	0.009613
ENSMUSG00000073532			3.186	0.03619											3.288	0.022	3.007	0.02194
ENSMUSG00000101249					6.042	3.473e-10					7.632	1.002e-14					7.256	9.944e-14
ENSMUSG00000079592					7.595	3.473e-10					7.964	5.18e-11					7.223	2.477e-09
ENSMUSG00000076612					-5.432	1.522e-08					-5.058	1.12e-07					-5.294	2.311e-08
ENSMUSG00000094335					-5.619	2.313e-08					-8.373	1.414e-12					-9.451	1.222e-13
ENSMUSG00000058922					-9.837	4.555e-07					-3.643	0.005039			8.504	0.0005481
ENSMUSG00000052759					9.554	2.122e-06			3.392	0.01371	9.748	6.533e-07					9.397	3.362e-06
ENSMUSG00000073125					9.286	9.565e-06					9.113	1.917e-05					8.707	0.0001227
ENSMUSG00000076545					-9.252	1.095e-05					-4.44	0.00127					-5.157	0.0002194
ENSMUSG00000047123					8.978	4.619e-05					10.44	1.338e-08					10.04	9.495e-08
ENSMUSG00000039278					3.753	0.0001172					3.853	6.219e-05					4.073	1.177e-05
ENSMUSG00000107176					-8.65	0.0002325					-8.565	0.0003281					-8.645	0.000157
ENSMUSG00000094198					-8.621	0.0002643					-5.288	0.002283					-4.525	0.003758
ENSMUSG00000039481					8.324	0.001129					8.518	0.0004155			4.161	0.001061	10.02	1.049e-07
ENSMUSG00000022938					-3.693	0.001537	8.043	0.01242	7.922	0.007576							-10.51	6.912e-09
ENSMUSG00000043165					3.495	0.001742					3.421	0.002051					3.579	0.0006952
ENSMUSG00000102101					3.484	0.002149					3.646	0.001035					3.183	0.005517
ENSMUSG00000095771					-5.393	0.002149					-4.306	0.009707					-5.383	0.001406
ENSMUSG00000095098					3.207	0.002149					3.28	0.001341					3.28	0.0009717
ENSMUSG00000071341					3.206	0.002589					3.139	0.0034					3.414	0.0006215
ENSMUSG00000092071					4.124	0.003364					3.934	0.01029					3.693	0.01422
ENSMUSG00000095351					-3.195	0.0048					-3.512	0.00127					-4.519	9.527e-06
ENSMUSG00000000740					2.95	0.007178					2.991	0.005039					2.946	0.004368
ENSMUSG00000037166					3.013	0.008687					2.958	0.00905					2.956	0.006712
ENSMUSG00000034686					2.938	0.009397					3.105	0.003804					3.16	0.002118
ENSMUSG00000079884					-3.034	0.01104			-4.381	0.0001693	-4.885	6.511e-06			-4.255	0.0001831	-4.762	5.08e-06
ENSMUSG00000096883					3.618	0.01885									3.764	0.004939	4.483	0.0002194
ENSMUSG00000096715					-2.983	0.02107					-4.379	0.0001468					-3.965	0.0003006
ENSMUSG00000094872					-4.84	0.0239					-4.675	0.0265					-8.003	0.002618
ENSMUSG00000032532					2.702	0.0239					2.743	0.01545					2.837	0.007085
ENSMUSG00000047990					3.21	0.04987					3.27	0.02289					3.365	0.01424
ENSMUSG00000047485							-9.581	9.227e-06	-9.252	1.355e-05	-9.764	5.812e-07
ENSMUSG00000097272							9.276	4.065e-05			9.28	9.092e-06	9.174	8.574e-05			9.175	9.6e-06
ENSMUSG00000005696							4.584	0.006438	4.905	0.001269	6.06	0.0001183			3.97	0.04311	5.126	0.004262
ENSMUSG00000086068							8.218	0.006438			5.125	0.008091	8.254	0.004908			5.088	0.004904
ENSMUSG00000047370									-8.045	0.004329	-7.831	0.007532			-8.13	0.003267	-7.91	0.003758
ENSMUSG00000076613											-3.55	0.0007661	-3.648	0.01004			-5.737	2.311e-08
ENSMUSG00000094475													-8.123	3.554e-09	-6.613	1.126e-05	-8.72	1.502e-11
ENSMUSG00000056071													-4.173	0.000665	-3.769	0.001554	-3.124	0.01422
ENSMUSG00000091243													-4.034	0.0008398	-3.86	0.0007126	-4.07	0.0001243
ENSMUSG00000075707													-3.22	0.02157	-2.937	0.03014	-2.952	0.01424
ENSMUSG00000090667													4.117	0.02509	8.644	0.0002778	5.594	0.0005793
	11.02	2.054e-09
